# Supplementary material for: XRCC4 and MRE11 Roles and Transcriptional Response to Repair of TALEN-Induced Double-Strand DNA Breaks
Source: MDPI journal article supplement (doi:10.3390/ijms23020593), 2022-01-06
Supplement: s1 [file s1]

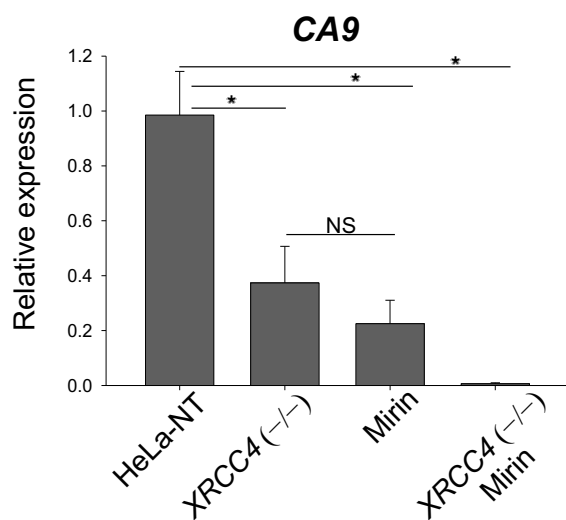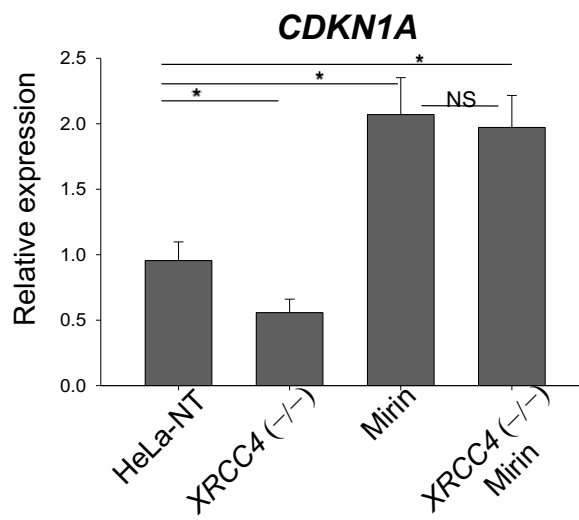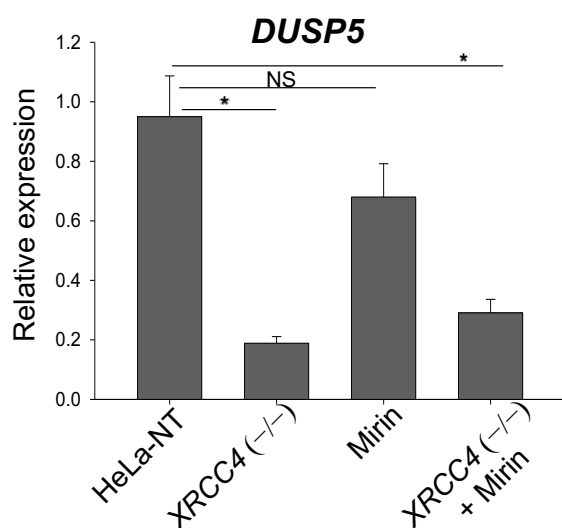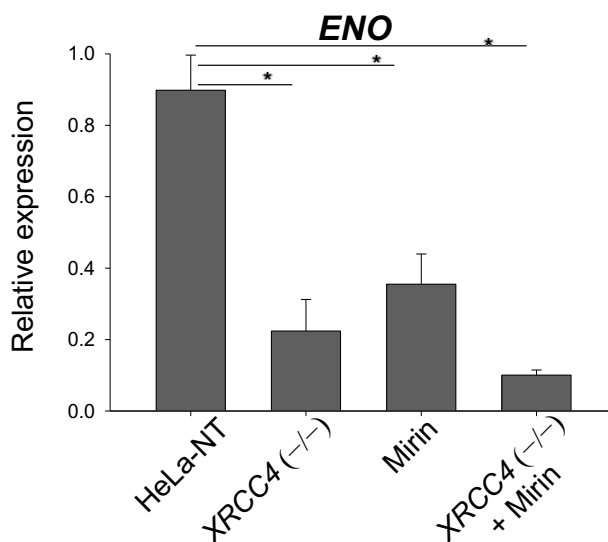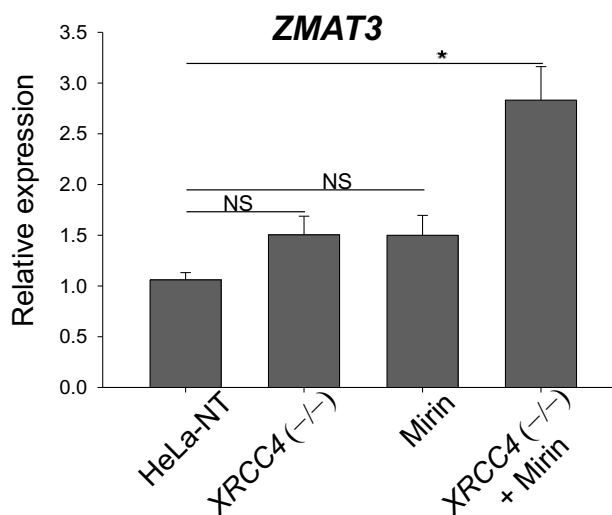

**Supplementary Figure S1: Validation of RNA-seq profile across all the categories.**

Changes in gene expression as analyzed by real time PCR. The data were represented as mean  $\pm$  SD and significance between groups were determined by ANOVA test where \* denoted  $p < 0.05$  and NS=Not significant.

## *XRCC4* (-/-) vs HeLa-NT

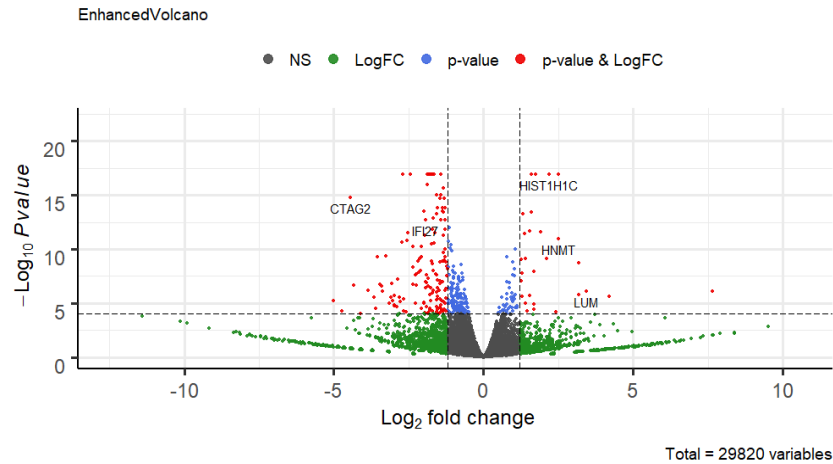

## Mirin vs HeLa-NT

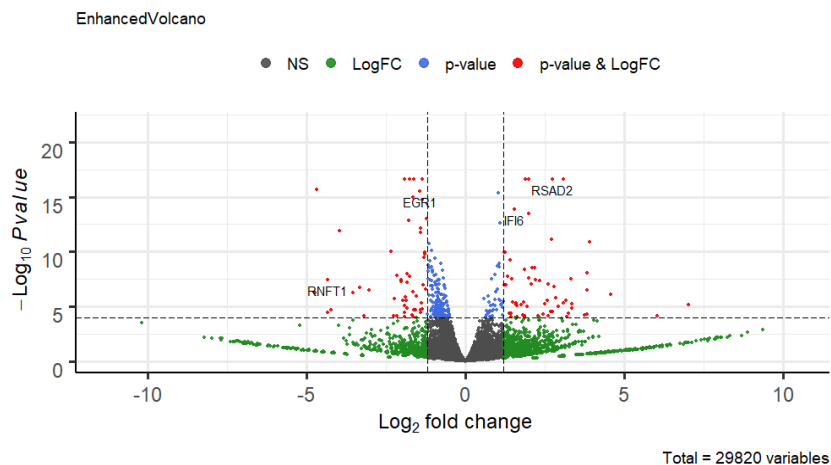

## *XRCC4* (-/-) + Mirin vs HeLa-NT

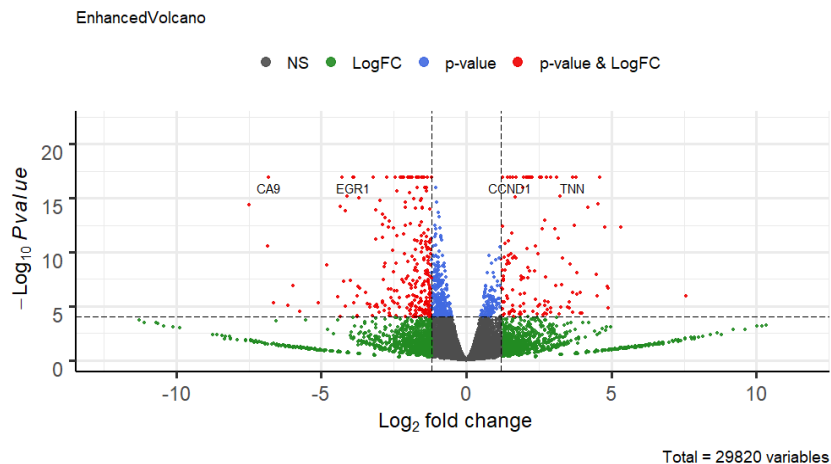

### Supplementary Figure S2: Volcano chart and functional enrichment analysis.

Volcano chart showing differentially expressed genes with  $FDR < 0.01$  and  $\log FC \geq 1.2$  compared to HeLa-NT cells A) *XRCC4*(-/-), B) Mirin treatment, C) *XRCC4*(-/-) + Mirin treatment.
